# Supplementary material for: Sequence analysis in Bos taurus reveals pervasiveness of X–Y arms races in mammalian lineages
Source: HighWire-hosted journal article supplement (doi:10.1101/gr.269902.120), 2020-11-18
Supplement: Supplemental_Table_S1.xlsx [file Supplemental_Table_S1.xlsx]

## Sheet: Sheet1
Supplemental Table S1: GenBank Accession Numbers for BACs in Bull MSY Assembly and Bull MSY AGP
for file format details see:
http://www.ncbi.nlm.nih.gov/projects/genome/assembly/agp/AGP_Specification.shtml#FORMAT
object	object begin	object end	part number	component type	component id /gap length	component beg /gap type	component end / linkage	orientation
chrY	1	153021	2	F	AC234910.2	1	153021	-
chrY	153022	332105	3	F	AC216981.4	1	179084	-
chrY	332106	400985	4	F	AC216937.5	1	68880	-
chrY	400986	559967	5	F	AC216938.4	1	158982	-
chrY	559968	670924	6	F	AC216982.4	53476	164432	+
chrY	670925	758960	7	F	AC170103.4	36016	124051	+
chrY	758961	873512	8	F	AC172693.4	1	114552	-
chrY	873513	1055051	9	F	AC217167.7	44695	226233	+
chrY	1055052	1167526	10	F	AC219969.4	76613	189087	+
chrY	1167527	1217526	11	N	50000	contig	no
chrY	1217527	1262106	12	F	AC234325.2	1	44580	+
chrY	1262107	1436360	13	F	AC171803.5	8338	182591	+
chrY	1436361	1527813	14	F	AC169534.5	56934	148386	+
chrY	1527814	1679016	15	F	AC171359.8	1	151203	-
chrY	1679017	1743606	16	F	AC220322.5	1	64590	-
chrY	1743607	1866330	17	F	AC152072.7	58790	181513	+
chrY	1866331	1968802	18	F	AC171703.5	1	102472	-
chrY	1968803	1984537	19	A	AC214585.8	130878	146612	-
chrY	1984538	1989537	20	N	5000	clone	yes
chrY	1989538	2079365	21	A	AC214585.8	3	89830	-
chrY	2079366	2084365	22	N	5000	clone	yes
chrY	2084366	2125971	23	A	AC214585.8	167448	209053	+
chrY	2125972	2126871	24	N	900	clone	yes
chrY	2126872	2132511	25	A	AC214585.8	103116	108755	+
chrY	2132512	2133757	26	N	1246	clone	yes
chrY	2133758	2142023	27	A	AC214585.8	122332	130597	-
chrY	2142024	2143067	28	N	1044	clone	yes
chrY	2143068	2153052	29	A	AC214585.8	112185	122169	-
chrY	2153053	2553052	30	N	400000	contig	no
chrY	2553053	2559130	31	A	AC218127.4	1	6078	-
chrY	2559131	2559163	32	N	33	clone	yes
chrY	2559164	2562387	33	A	AC218127.4	54542	57765	+
chrY	2562388	2563200	34	N	813	clone	yes
chrY	2563201	2566150	35	A	AC218127.4	27408	30357	-
chrY	2566151	2566189	36	N	39	clone	yes
chrY	2566190	2572443	37	A	AC218127.4	21040	27293	-
chrY	2572444	2572499	38	N	56	clone	yes
chrY	2572500	2579554	39	A	AC218127.4	88817	95871	+
chrY	2579555	2580406	40	N	852	clone	yes
chrY	2580407	2582773	41	A	AC218127.4	30459	32825	-
chrY	2582774	2582922	42	N	149	clone	yes
chrY	2582923	2587517	43	A	AC218127.4	76141	80735	-
chrY	2587518	2590028	44	N	2511	clone	yes
chrY	2590029	2594605	45	A	AC218127.4	8373	12949	-
chrY	2594606	2598003	46	N	3398	clone	yes
chrY	2598004	2604389	47	A	AC218127.4	32967	39352	-
chrY	2604390	2606870	48	N	2481	clone	yes
chrY	2606871	2614549	49	A	AC218127.4	46509	54187	+
chrY	2614550	2615588	50	N	1039	clone	yes
chrY	2615589	2618948	51	A	AC218127.4	43014	46373	-
chrY	2618949	2621657	52	N	2709	clone	yes
chrY	2621658	2629507	53	A	AC218127.4	80849	88698	+
chrY	2629508	2630543	54	N	1036	clone	yes
chrY	2630544	2634485	55	A	AC218127.4	13052	16993	+
chrY	2634486	2635685	56	N	1200	clone	yes
chrY	2635686	2639483	57	A	AC218127.4	17122	20919	-
chrY	2639484	2646316	58	N	6833	clone	yes
chrY	2646317	2657022	59	A	AC218127.4	61447	72152	-
chrY	2657023	3057022	60	N	400000	contig	no
chrY	3057023	3059899	61	A	AC234328.1	63099	65975	+
chrY	3059900	3060001	62	N	102	clone	yes
chrY	3060002	3062604	63	A	AC234328.1	13616	16218	-
chrY	3062605	3063289	64	N	685	clone	yes
chrY	3063290	3066936	65	A	AC234328.1	66076	69722	-
chrY	3066937	3067968	66	N	1032	clone	yes
chrY	3067969	3071394	67	A	AC234328.1	69823	73248	-
chrY	3071395	3071396	68	N	2	clone	yes
chrY	3071397	3074374	69	A	AC234328.1	16320	19297	-
chrY	3074375	3075440	70	N	1066	clone	yes
chrY	3075441	3079224	71	A	AC234328.1	54572	58355	+
chrY	3079225	3080055	72	N	831	clone	yes
chrY	3080056	3088756	73	A	AC234328.1	91086	99786	-
chrY	3088757	3089201	74	N	445	clone	yes
chrY	3089202	3104274	75	A	AC234328.1	33015	48087	+
chrY	3104275	3105645	76	N	1371	clone	yes
chrY	3105646	3119160	77	A	AC234328.1	1	13515	-
chrY	3119161	3121379	78	N	2219	clone	yes
chrY	3121380	3126495	79	A	AC234328.1	73349	78464	-
chrY	3126496	3128103	80	N	1608	clone	yes
chrY	3128104	3138911	81	A	AC234328.1	22103	32910	+
chrY	3138912	3140176	82	N	1265	clone	yes
chrY	3140177	3146340	83	A	AC234328.1	48308	54471	-
chrY	3146341	3146532	84	N	192	clone	yes
chrY	3146533	3156656	85	A	AC234328.1	80862	90985	+
chrY	3156657	3159242	86	N	2586	clone	yes
chrY	3159243	3161845	87	A	AC234328.1	19398	22000	+
chrY	3161846	3163108	88	N	1263	clone	yes
chrY	3163109	3165071	89	A	AC234328.1	78571	80533	+
chrY	3165072	3465071	90	N	300000	contig	no
chrY	3465072	3468228	91	A	AC245851.4	110376	113532	-
chrY	3468229	3468377	92	N	149	clone	yes
chrY	3468378	3470169	93	A	AC245851.4	107934	109725	+
chrY	3470170	3470627	94	N	458	clone	yes
chrY	3470628	3477297	95	A	AC245851.4	98159	104828	-
chrY	3477298	3479859	96	N	2562	clone	yes
chrY	3479860	3483240	97	A	AC245851.4	181403	184783	-
chrY	3483241	3485240	98	N	2000	clone	yes
chrY	3485241	3546401	99	A	AC245851.4	120141	181301	+
chrY	3546402	3548401	100	N	2000	clone	yes
chrY	3548402	3646285	101	A	AC245851.4	71	97954	+
chrY	3646286	4476285	102	N	830000	contig	no
chrY	4476286	4485890	103	A	AC247033.1	1	9605	+
chrY	4485891	4486090	104	N	200	clone	yes
chrY	4486091	4515888	105	A	AC247033.1	42203	72000	-
chrY	4515889	4516088	106	N	200	clone	yes
chrY	4516089	4548495	107	A	AC247033.1	9706	42112	+
chrY	4548496	4655949	108	A	AC245906.1	3867	111320	+
chrY	4655950	4669827	109	A	AC238842.2	42912	56789	+
chrY	4669828	4670027	110	N	200	clone	yes
chrY	4670028	4673217	111	A	AC238842.2	29291	32480	+
chrY	4673218	4673417	112	N	200	clone	yes
chrY	4673418	4684587	113	A	AC238842.2	56890	68059	+
chrY	4684588	4684787	114	N	200	clone	yes
chrY	4684788	4693884	115	A	AC238842.2	83315	92411	-
chrY	4693885	4694084	116	N	200	clone	yes
chrY	4694085	4709139	117	A	AC238842.2	68160	83214	+
chrY	4709140	5509139	118	N	800000	contig	no
chrY	5509140	5518457	119	A	AC236838.1	1	9318	+
chrY	5518458	5518657	120	N	200	clone	yes
chrY	5518658	5528775	121	A	AC236838.1	12564	22681	-
chrY	5528776	5528975	122	N	200	clone	yes
chrY	5528976	5534783	123	A	AC236838.1	32215	38022	+
chrY	5534784	5534983	124	N	200	clone	yes
chrY	5534984	5537729	125	A	AC236838.1	29369	32114	-
chrY	5537730	5537929	126	N	200	clone	yes
chrY	5537930	5540932	127	A	AC236838.1	22783	25785	-
chrY	5540933	5541132	128	N	200	clone	yes
chrY	5541133	5547065	129	A	AC236838.1	38123	44055	-
chrY	5547066	5547265	130	N	200	clone	yes
chrY	5547266	5550310	131	A	AC236838.1	9419	12463	+
chrY	5550311	5550710	132	N	400	clone	yes
chrY	5550711	5661380	133	A	AC232996.6	35565	146234	-
chrY	5661381	5816258	134	F	AC233215.5	1	154878	-
chrY	5816259	5975258	135	F	AC239705.3	1	159000	-
chrY	5975259	6075258	136	N	100000	contig	no
chrY	6075259	6151449	137	A	AC245769.6	36181	112371	-
chrY	6151450	6251449	138	N	100000	contig	no
chrY	6251450	6330221	139	A	AC245766.4	73417	152188	-
chrY	6330222	6431221	140	A	AC234853.4	29179	130178	+
chrY	6431222	6531221	141	N	100000	contig	no
chrY	6531222	6619538	142	A	AC240403.10	94849	183165	-
chrY	6619539	6783515	143	F	AC240751.4	1	163977	+
chrY	6783516	6883515	144	N	100000	contig	no
chrY	6883516	6949942	145	F	AC240751.4	55200	121626	-
chrY	6949943	7111207	146	F	AC232995.5	1	161265	-
chrY	7111208	7211207	147	N	100000	contig	no
chrY	7211208	7404420	148	F	AC241802.2	1	193213	+
chrY	7404421	7474323	149	F	AC242420.3	-11	69891	-
chrY	7474324	7574672	150	F	AC236841.11	61288	161636	+
chrY	7574673	7765237	151	F	AC163575.4	17058	207622	+
chrY	7765238	7830583	152	F	AC238952.5	82586	147931	+
chrY	7830584	7836390	153	F	AC215843.9	40014	45820	+
chrY	7836391	8006176	154	F	AC233691.4	1	169786	-
chrY	8006177	8168053	155	F	AC232754.4	49089	210965	+
chrY	8168054	8277916	156	F	AC225835.11	89997	199859	+
chrY	8277917	8337064	157	F	AC215832.6	103767	162914	+
chrY	8337065	8433566	158	F	AC215845.7	72140	168641	+
chrY	8433567	8493399	159	F	AC232750.3	1	59833	-
chrY	8493400	8654447	160	F	AC160813.3	40097	201144	+
chrY	8654448	8729808	161	F	AC232285.7	1	75361	-
chrY	8729809	8861569	162	F	AC161980.4	1	131761	-
chrY	8861570	8951142	163	F	AC215891.2	56143	145715	+
chrY	8951143	9090795	164	F	AC220321.6	11949	151601	+
chrY	9090796	9199924	165	F	AC172950.4	1	109129	-
chrY	9199925	9201105	166	A	AC157430.2	162617	163797	-
chrY	9201106	9204638	167	N	3533	clone	yes
chrY	9204639	9208407	168	A	AC157430.2	176932	180700	-
chrY	9208408	9230345	169	N	21938	clone	yes
chrY	9230346	9231495	170	A	AC157430.2	114073	115222	-
chrY	9231496	9233065	171	N	1570	clone	yes
chrY	9233066	9234965	172	A	AC157430.2	151819	153718	-
chrY	9234966	9242360	173	N	7395	clone	yes
chrY	9242361	9244245	174	A	AC157430.2	52708	54592	+
chrY	9244246	9246587	175	N	2342	clone	yes
chrY	9246588	9248419	176	A	AC157430.2	120627	122458	-
chrY	9248420	9249042	177	N	623	clone	yes
chrY	9249043	9252286	178	A	AC157430.2	166727	169970	-
chrY	9252287	9255228	179	N	2942	clone	yes
chrY	9255229	9257063	180	A	AC157430.2	49310	51144	+
chrY	9257064	9257794	181	N	731	clone	yes
chrY	9257795	9259641	182	A	AC157430.2	131489	133335	-
chrY	9259642	9260635	183	N	994	clone	yes
chrY	9260636	9262375	184	A	AC157430.2	133436	135175	-
chrY	9262376	9266267	185	N	3892	clone	yes
chrY	9266268	9268031	186	A	AC157430.2	42236	43999	+
chrY	9268032	9272337	187	N	4306	clone	yes
chrY	9272338	9274699	188	A	AC157430.2	140254	142615	-
chrY	9274700	9275818	189	N	1119	clone	yes
chrY	9275819	9277788	190	A	AC157430.2	54693	56662	+
chrY	9277789	9278521	191	N	733	clone	yes
chrY	9278522	9281157	192	A	AC157430.2	149083	151718	-
chrY	9281158	9281462	193	N	305	clone	yes
chrY	9281463	9283163	194	A	AC157430.2	44100	45800	+
chrY	9283164	9283684	195	N	521	clone	yes
chrY	9283685	9285170	196	A	AC157430.2	111124	112609	-
chrY	9285171	9290314	197	N	5144	clone	yes
chrY	9290315	9309504	198	A	AC157430.2	2783	21972	+
chrY	9309505	9309900	199	N	396	clone	yes
chrY	9309901	9311651	200	A	AC157430.2	982	2732	+
chrY	9311652	9511651	201	N	200000	contig	no
chrY	9511652	9524718	202	A	AC234911.1	15815	28881	-
chrY	9524719	9524939	203	N	221	clone	yes
chrY	9524940	9536368	204	A	AC234911.1	32162	43590	-
chrY	9536369	9538488	205	N	2120	clone	yes
chrY	9538489	9542479	206	A	AC234911.1	43697	47687	-
chrY	9542480	9543014	207	N	535	clone	yes
chrY	9543015	9546617	208	A	AC234911.1	50418	54020	-
chrY	9546618	9547515	209	N	898	clone	yes
chrY	9547516	9551155	210	A	AC234911.1	1	3640	-
chrY	9551156	9551265	211	N	110	clone	yes
chrY	9551266	9557870	212	A	AC234911.1	54121	60725	-
chrY	9557871	9559819	213	N	1949	clone	yes
chrY	9559820	9562340	214	A	AC234911.1	13179	15699	+
chrY	9562341	9566750	215	N	4410	clone	yes
chrY	9566751	9569642	216	A	AC234911.1	29065	31956	-
chrY	9569643	9571325	217	N	1683	clone	yes
chrY	9571326	9577946	218	A	AC234911.1	68410	75030	+
chrY	9577947	9578903	219	N	957	clone	yes
chrY	9578904	9582651	220	A	AC234911.1	3741	7488	-
chrY	9582652	9584781	221	N	2130	clone	yes
chrY	9584782	9587057	222	A	AC234911.1	47982	50257	-
chrY	9587058	9594215	223	N	7158	clone	yes
chrY	9594216	9601618	224	A	AC234911.1	60891	68293	+
chrY	9601619	9602709	225	N	1091	clone	yes
chrY	9602710	9608053	226	A	AC234911.1	7605	12948	-
chrY	9608054	9808053	227	N	200000	contig	no
chrY	9808054	9812255	228	A	AC245772.1	128245	132446	-
chrY	9812256	9816621	229	N	4366	contig	yes
chrY	9816622	9824489	230	A	AC245772.1	1	7868	+
chrY	9824490	9824869	231	N	380	contig	yes
chrY	9824870	9830609	232	A	AC245772.1	94170	99909	+
chrY	9830610	9833741	233	N	3132	clone	yes
chrY	9833742	9841378	234	A	AC245772.1	56113	63749	-
chrY	9841379	9843830	235	N	2452	clone	yes
chrY	9843831	9844063	236	A	AC245772.1	5897	6129	+
chrY	9844064	9981005	237	F	AC218128.5	1	136942	-
chrY	9981006	9997844	238	F	AC226431.3	1	16839	-
chrY	9997845	10087591	239	F	AC167351.3	70561	160307	+
chrY	10087592	10282317	240	F	AC166505.5	1	194726	-
chrY	10282318	10401433	241	F	AC237565.4	1	119116	-
chrY	10401434	10500175	242	F	AC238847.3	36957	135698	+
chrY	10500176	10639676	243	F	AC217073.2	1	139501	-
chrY	10639677	10724581	244	F	AC217072.3	1	84905	-
chrY	10724582	10871396	245	F	AC215833.14	1	146815	-
chrY	10871397	10928822	246	F	AC237562.5	1	57426	-
chrY	10928823	11109513	247	F	AC165011.4	56142	236832	+
chrY	11109514	11217053	248	F	AC217152.14	52404	159943	+
chrY	11217054	11325584	249	F	AC216759.10	1	108531	-
chrY	11325585	11438853	250	F	AC175770.8	67742	181010	+
chrY	11438854	11531421	251	F	AC237557.3	1	92568	-
chrY	11531422	11681659	252	F	AC213707.3	27755	177992	+
chrY	11681660	11802882	253	F	AC234092.5	145940	267162	+
chrY	11802883	11946982	254	F	AC216695.5	25221	169320	+
chrY	11946983	12004317	255	F	AC213720.4	1	57335	-
chrY	12004318	12184062	256	F	AC232752.3	15253	194997	+
chrY	12184063	12325154	257	F	AC226189.7	1	141092	-
chrY	12325155	12384437	258	F	AC161786.5	1	59283	-
chrY	12384438	12536903	259	F	AC226430.3	1	152466	-
chrY	12536904	12581836	260	F	AC233217.7	118961	163893	+
chrY	12581837	12732261	261	F	AC232984.2	18685	169109	+
chrY	12732262	12813573	262	F	AC213491.7	131391	212702	+
chrY	12813574	13001805	263	F	AC213701.3	1	188232	-
chrY	13001806	13153191	264	F	AC213706.3	1	151386	-
chrY	13153192	13294450	265	F	AC225912.3	1	141259	-
chrY	13294451	13441281	266	F	AC234951.2	1	146831	-
chrY	13441282	13527541	267	F	AC235984.4	1	86260	-
chrY	13527542	13633963	268	F	AC233798.4	1	106422	-
chrY	13633964	13774168	269	F	AC232759.3	1	140205	-
chrY	13774169	13931745	270	F	AC226428.3	17183	174759	+
chrY	13931746	14118929	271	F	AC216983.2	1	187184	-
chrY	14118930	14262314	272	F	AC182889.11	18359	161743	+
chrY	14262315	14413162	273	F	AC234147.6	14232	165079	+
chrY	14413163	14462023	274	F	AC233690.5	114979	163839	+
chrY	14462024	14590341	275	F	AC232757.2	48706	177023	+
chrY	14590342	14640341	276	N	50000	contig	no
chrY	14640342	14775058	277	F	AC171606.4	1	134717	+
chrY	14775059	14930733	278	F	AC215665.3	39387	195061	+
chrY	14930734	15082098	279	F	AC231833.2	7750	159114	+
chrY	15082099	15214811	280	F	AC233687.4	1	132713	-
chrY	15214812	15317793	281	F	AC216752.10	87403	190384	+
chrY	15317794	15375636	282	F	AC233216.3	1	57843	-
chrY	15375637	15526904	283	F	AC225935.2	1	151268	-
chrY	15526905	15684642	284	F	AC213443.3	1	157738	-
chrY	15684643	15804712	285	F	AC233170.4	1	120070	-
chrY	15804713	15926322	286	F	AC226030.5	38900	160509	+
chrY	15926323	16037383	287	F	AC216977.3	55559	166619	+
chrY	16037384	16105679	288	F	AC226028.3	1	68296	-
chrY	16105680	16262804	289	F	AC217332.4	1	157125	-
chrY	16262805	16445351	290	F	AC213716.2	55441	237987	+
chrY	16445352	16617606	291	F	AC225844.8	13433	185687	+
chrY	16617607	16720897	292	F	AC231869.4	1	103291	-
chrY	16720898	16860944	293	F	AC216714.5	102721	242767	+
chrY	16860945	16953578	294	F	AC213450.5	1	92634	-
chrY	16953579	17038446	295	F	AC226029.3	48724	133591	+
chrY	17038447	17174785	296	F	AC231398.4	1	136339	-
chrY	17174786	17281788	297	F	AC232284.3	1	107003	-
chrY	17281789	17411561	298	F	AC225934.6	53723	183495	+
chrY	17411562	17526485	299	F	AC216713.5	1	114924	-
chrY	17526486	17640416	300	F	AC231449.8	59994	173924	+
chrY	17640417	17761837	301	F	AC236015.3	78792	200212	+
chrY	17761838	17839799	302	F	AC174525.4	94011	171972	+
chrY	17839800	17926484	303	F	AC213441.3	1	86685	-
chrY	17926485	18065221	304	F	AC225911.4	23711	162447	+
chrY	18065222	18187476	305	F	AC232758.3	3	122257	-
chrY	18187477	18299579	306	F	AC225843.2	69576	181678	+
chrY	18299580	18428287	307	F	AC231848.3	1	128708	-
chrY	18428288	18625923	308	F	AC165885.4	1	197636	-
chrY	18625924	18806317	309	F	AC232760.4	1	180394	-
chrY	18806318	18867923	310	F	AC233175.2	82551	144156	+
chrY	18867924	19064686	311	F	AC152637.5	1	196763	-
chrY	19064687	19132796	312	F	AC232930.2	78037	146146	+
chrY	19132797	19190799	313	F	AC234145.6	68766	126768	+
chrY	19190800	19310476	314	F	AC216833.4	1	119677	-
chrY	19310477	19455125	315	F	AC167902.4	42414	187062	+
chrY	19455126	19534741	316	F	AC241262.2	24251	103866	+
chrY	19534742	19546878	317	A	AC245852.1	31416	43552	-
chrY	19546879	19556878	318	N	10000	clone	yes
chrY	19556879	19560593	319	A	AC245852.1	82652	86366	+
chrY	19560594	19734756	320	F	AC245773.3	1	174163	-
chrY	19734757	19820595	321	F	AC216978.4	1	85839	-
chrY	19820596	19998413	322	F	AC213445.4	4794	182611	+
chrY	19998414	20095726	323	F	AC175134.4	1	97313	-
chrY	20095727	20239110	324	F	AC232281.7	1	143384	-
chrY	20239111	20332190	325	F	AC233692.4	53124	146203	+
chrY	20332191	20442355	326	F	AC234101.5	105893	216057	+
chrY	20442356	20540816	327	F	AC232983.2	31983	130443	+
chrY	20540817	20625020	328	F	AC226025.5	78787	162990	+
chrY	20625021	20781263	329	F	AC232755.11	12078	168320	+
chrY	20781264	20904353	330	F	AC215847.4	42246	165335	+
chrY	20904354	21003001	331	F	AC216756.5	61661	160308	+
chrY	21003002	21126661	332	F	AC225842.3	51683	175342	+
chrY	21126662	21258185	333	F	AC213449.3	48403	179926	+
chrY	21258186	21394733	334	F	AC225838.2	30659	167206	+
chrY	21394734	21461440	335	F	AC231450.5	1	66707	-
chrY	21461441	21587429	336	F	AC234322.5	1	125989	-
chrY	21587430	21709246	337	F	AC234573.3	1	121817	-
chrY	21709247	21855340	338	F	AC232940.2	21158	167251	+
chrY	21855341	21970230	339	F	AC170222.4	40256	155145	+
chrY	21970231	22104912	340	F	AC213715.2	1	134682	-
chrY	22104913	22277753	341	F	AC213448.3	1	172841	-
chrY	22277754	22430898	342	F	AC233169.3	16350	169494	+
chrY	22430899	22559892	343	F	AC237564.3	33892	162885	+
chrY	22559893	22708804	344	F	AC213538.3	1	148912	-
chrY	22708805	22730504	345	F	AC237558.2	130064	151763	+
chrY	22730505	22826963	346	F	AC238848.2	16790	113248	+
chrY	22826964	22898412	347	F	AC232315.5	1	71449	-
chrY	22898413	23053461	348	F	AC226433.5	1	155049	-
chrY	23053462	23181751	349	F	AC169218.5	14715	143004	+
chrY	23181752	23235635	350	F	AC175544.5	1	53884	-
chrY	23235636	23374219	351	F	AC226437.5	1	138584	-
chrY	23374220	23499463	352	F	AC232756.3	1	125244	-
chrY	23499464	23663356	353	F	AC175430.4	1	163893	-
chrY	23663357	23736160	354	F	AC234912.4	75301	148104	+
chrY	23736161	23863803	355	F	AC235983.5	1	127643	-
chrY	23863804	24060884	356	F	AC217070.3	1	197081	-
chrY	24060885	24144487	357	F	AC215667.6	1	83603	-
chrY	24144488	24186770	358	F	AC213393.6	76025	118307	-
chrY	24186771	24338897	359	F	AC225845.5	1	152127	-
chrY	24338898	24413029	360	F	AC237556.2	1	74132	-
chrY	24413030	24542892	361	F	AC232928.3	50693	180555	+
chrY	24542893	24580108	362	F	AC231395.2	1	37216	-
chrY	24580109	24776374	363	F	AC216758.6	1	196266	-
chrY	24776375	24893907	364	F	AC226435.4	1	117533	-
chrY	24893908	24950162	365	F	AC226100.6	1	56255	-
chrY	24950163	25103339	366	F	AC216753.2	1	153177	-
chrY	25103340	25234266	367	F	AC213708.4	1	130927	-
chrY	25234267	25431501	368	F	AC229802.4	1	197235	-
chrY	25431502	25551158	369	F	AC232931.4	101011	220667	+
chrY	25551159	25615873	370	F	AC231448.4	94112	158826	+
chrY	25615874	25783627	371	F	AC213703.5	1	167754	-
chrY	25783628	25813321	372	F	AC231396.3	136476	166169	+
chrY	25813322	25993104	373	F	AC216711.6	1	179783	-
chrY	25993105	26090654	374	F	AC225913.4	83786	181335	+
chrY	26090655	26252673	375	F	AC213711.3	24255	186273	+
chrY	26252674	26330036	376	F	AC225999.3	1	77363	-
chrY	26330037	26414674	377	F	AC232751.5	1	84638	-
chrY	26414675	26552875	378	F	AC216908.11	1339	139539	-
chrY	26552876	26604523	379	F	AC229800.3	116443	168090	+
chrY	26604524	26728227	380	F	AC169344.5	44049	167752	+
chrY	26728228	26835739	381	F	AC161642.6	1	107512	-
chrY	26835740	26919143	382	A	AC215846.12	13540	96943	-
chrY	26919144	27082397	383	F	AC216718.3	1	163254	+
chrY	27082398	27211617	384	F	AC226597.3	32852	162071	+
chrY	27211618	27348567	385	F	AC226425.3	1	136950	-
chrY	27348568	27375815	386	F	AC232941.3	10	27257	-
chrY	27375816	27544138	387	F	AC226026.6	1	168323	-
chrY	27544139	27656006	388	F	AC213451.4	1	111868	-
chrY	27656007	27751709	389	F	AC226099.3	94804	190506	+
chrY	27751710	27893715	390	F	AC233563.9	1316	143321	+
chrY	27893716	27968639	391	F	AC234949.2	64803	139726	+
chrY	27968640	28031520	392	F	AC238846.2	1	62881	-
chrY	28031521	28159626	393	F	AC234324.2	1	128106	-
chrY	28159627	28281930	394	F	AC233162.4	35838	158141	+
chrY	28281931	28444062	395	F	AC231868.3	46422	208553	+
chrY	28444063	28601935	396	F	AC233176.5	85242	243114	+
chrY	28601936	28721364	397	F	AC234326.4	56244	175672	+
chrY	28721365	28847201	398	F	AC233220.5	5581	131417	+
chrY	28847202	29039270	399	F	AC235958.4	22929	214997	+
chrY	29039271	29171619	400	F	AC232768.2	1	132349	-
chrY	29171620	29284934	401	F	AC232286.3	80670	193984	+
chrY	29284935	29381726	402	F	AC232881.2	1	96792	-
chrY	29381727	29552618	403	F	AC226432.3	8808	179699	+
chrY	29552619	29609853	404	F	AC225774.4	1	57235	-
chrY	29609854	29742059	405	F	AC216697.5	38318	170523	+
chrY	29742060	29897099	406	F	AC157133.3	28973	184012	+
chrY	29897100	29999045	407	F	AC225833.3	90952	192897	+
chrY	29999046	30172229	408	F	AC216761.5	30560	203743	+
chrY	30172230	30365635	409	F	AC213722.9	1	193406	-
chrY	30365636	30476503	410	F	AC215844.2	63077	173944	+
chrY	30476504	30532842	411	F	AC216979.3	1	56339	-
chrY	30532843	30680350	412	F	AC232314.5	24249	171756	+
chrY	30680351	30813068	413	F	AC226436.4	1	132718	-
chrY	30813069	30922518	414	F	AC237559.2	20389	129838	+
chrY	30922519	31061193	415	F	AC162496.4	1	138675	-
chrY	31061194	31200907	416	F	AC229803.4	1	139714	-
chrY	31200908	31295499	417	F	AC232994.4	69389	163980	+
chrY	31295500	31426103	418	F	AC232993.2	1	130604	-
chrY	31426104	31522815	419	F	AC231867.4	64153	160864	+
chrY	31522816	31670843	420	F	AC225936.3	1	148028	-
chrY	31670844	31739157	421	F	AC229870.5	97531	165844	+
chrY	31739158	31863651	422	F	AC231520.5	1	124494	-
chrY	31863652	31959345	423	F	AC234948.4	1	95694	-
chrY	31959346	32116003	424	F	AC245905.3	60829	217486	+
chrY	32116004	32223780	425	F	AC247032.3	1	107777	-
chrY	32223781	32249168	426	F	AC247034.2	99226	124613	+
chrY	32249169	32389177	427	F	AC245765.1	1	140009	-
chrY	32389178	32450693	428	F	AC232939.3	105939	167454	+
chrY	32450694	32500693	429	N	50000	contig	no
chrY	32500694	32640844	430	F	AC225949.2	1	140151	-
chrY	32640845	32769087	431	F	AC213721.4	1	128243	-
chrY	32769088	32911638	432	F	AC225910.2	1	142551	-
chrY	32911639	33043017	433	F	AC213444.4	50390	181768	+
chrY	33043018	33194839	434	F	AC225846.3	1	151822	-
chrY	33194840	33352728	435	F	AC226193.7	1	157889	-
chrY	33352729	33429151	436	F	AC226427.2	94219	170641	+
chrY	33429152	33510124	437	F	AC226191.3	51570	132542	+
chrY	33510125	33615966	438	F	AC237560.3	44473	150314	+
chrY	33615967	33624620	439	A	AC233564.4	79007	87660	+
chrY	33624621	33629620	440	N	5000	clone	yes
chrY	33629621	33631592	441	A	AC233564.4	11790	13761	-
chrY	33631593	33823324	442	F	AC156846.4	1	191732	+
chrY	33823325	33974674	443	F	AC233167.3	1	151350	-
chrY	33974675	34047382	444	F	AC233552.3	1	72708	-
chrY	34047383	34185011	445	F	AC235603.9	1	137629	-
chrY	34185012	34331501	446	F	AC213702.10	90842	237331	+
chrY	34331502	34438391	447	F	AC229872.5	1	106890	-
chrY	34438392	34598955	448	F	AC231446.2	13571	174134	+
chrY	34598956	34742603	449	F	AC225937.4	23225	166872	+
chrY	34742604	34903414	450	F	AC213704.4	34810	195620	+
chrY	34903415	35101787	451	F	AC213723.11	1	198373	-
chrY	35101788	35128329	452	F	AC233218.5	1	26542	-
chrY	35128330	35257365	453	F	AC215892.4	24945	153980	+
chrY	35257366	35417485	454	F	AC234950.2	6927	167046	+
chrY	35417486	35551610	455	F	AC233688.4	55543	189667	+
chrY	35551611	35660288	456	F	AC226424.2	72205	180882	+
chrY	35660289	35803307	457	F	AC216716.4	1	143019	-
chrY	35803308	35860145	458	F	AC216754.5	1	56838	-
chrY	35860146	36000456	459	F	AC232753.3	1	140311	-
chrY	36000457	36152463	460	F	AC232932.3	1	152007	-
chrY	36152464	36261182	461	F	AC229869.3	1	108719	-
chrY	36261183	36333422	462	F	AC226422.3	85930	158169	+
chrY	36333423	36450695	463	F	AC213712.3	61534	178806	+
chrY	36450696	36579423	464	F	AC216832.3	1	128728	-
chrY	36579424	36625081	465	F	AC232982.4	108082	153739	+
chrY	36625082	36780915	466	F	AC233168.3	14512	170345	+
chrY	36780916	36818004	467	F	AC226000.3	1	37089	-
chrY	36818005	36958125	468	F	AC232938.5	37320	177440	+
chrY	36958126	37108282	469	F	AC232282.4	1204	151360	-
chrY	37108283	37251460	470	F	AC232313.3	30376	173553	+
chrY	37251461	37439132	471	F	AC213714.4	41686	229357	+
chrY	37439133	37561127	472	F	AC216717.6	95793	217787	+
chrY	37561128	37671409	473	F	AC225841.2	1	110282	-
chrY	37671410	37782407	474	F	AC213705.4	51915	162912	+
chrY	37782408	37968369	475	F	AC238845.3	29919	215880	+
chrY	37968370	38119384	476	F	AC239693.4	1	151015	-
chrY	38119385	38242847	477	F	AC235956.3	29823	153285	+
chrY	38242848	38394712	478	F	AC233221.4	1	151865	-
chrY	38394713	38399266	479	A	AC244028.1	26291	30844	-
chrY	38399267	38419266	480	N	20000	clone	yes
chrY	38419267	38420656	481	A	AC244028.1	82413	83802	-
chrY	38420657	38528031	482	F	AC237570.4	1	107375	+
chrY	38528032	38581070	483	F	AC229801.5	1	53039	-
chrY	38581071	38713179	484	F	AC232278.3	48139	180247	+
chrY	38713180	38906359	485	F	AC226192.6	1	193180	-
chrY	38906360	39000650	486	F	AC174903.6	62161	156451	+
chrY	39000651	39160832	487	F	AC169357.6	4348	164529	+
chrY	39160833	39291502	488	F	AC232942.5	1	130670	-
chrY	39291503	39422427	489	F	AC234146.6	1	130925	-
chrY	39422428	39519030	490	F	AC237566.2	82711	179313	+
chrY	39519031	39669710	491	F	AC238843.3	30654	181333	+
chrY	39669711	39688446	492	F	AC233222.5	136123	154858	+
chrY	39688447	39816015	493	F	AC229881.10	1	127569	-
chrY	39816016	39949856	494	F	AC231847.4	1	133841	-
chrY	39949857	40051340	495	F	AC213718.3	1	101484	-
chrY	40051341	40116953	496	F	AC226021.5	55433	121045	+
chrY	40116954	40284361	497	F	AC234210.5	1	167408	-
chrY	40284362	40437273	498	F	AC235955.5	1	152912	-
chrY	40437274	40622428	499	F	AC234571.4	18457	203611	+
chrY	40622429	40679678	500	F	AC232929.5	111903	169152	+
chrY	40679679	40766218	501	F	AC231447.2	82196	168735	+
chrY	40766219	40973653	502	F	AC216830.3	1	207435	-
chrY	40973654	41005110	503	F	AC216980.3	123479	154935	+
chrY	41005111	41101258	504	F	AC237567.2	40875	137022	+
chrY	41101259	41199546	505	F	AC231835.3	1	98288	-
chrY	41199547	41321609	506	F	AC226022.3	56624	178686	+
chrY	41321610	41378082	507	F	AC213442.3	1	56473	-
chrY	41378083	41477851	508	F	AC232927.2	1	99769	-
chrY	41477852	41610723	509	F	AC231834.3	17888	150759	+
chrY	41610724	41762686	510	F	AC225839.4	1	151963	-
chrY	41762687	41933747	511	F	AC213709.3	72096	243156	+
chrY	41933748	42078089	512	F	AC229882.3	54032	198373	+
chrY	42078090	42176425	513	F	AC229799.4	1	98336	-
chrY	42176426	42282790	514	F	AC233970.4	54966	161330	+
chrY	42282791	42301890	515	F	AC235957.2	1	19100	-
chrY	42301891	42439775	516	F	AC216712.3	1	137885	-
chrY	42439776	42638639	517	F	AC213717.4	25341	224204	+
chrY	42638640	42741963	518	F	AC225788.2	48252	151575	+
chrY	42741964	42880792	519	F	AC164336.3	1	138829	-
chrY	42880793	43012047	520	F	AC233686.3	49992	181246	+
chrY	43012048	43149257	521	F	AC232879.2	33497	170706	+
chrY	43149258	43309542	522	F	AC232880.1	1937	162221	+
chrY	43309543	43443568	523	F	AC239777.3	1	134026	-
chrY	43443569	43448177	524	F	AC242832.6	1	4609	-
chrY	43448178	43548177	525	N	100000	contig	no
chrY	43548178	43715948	526	F	AC235959.5	1	167771	-
chrY	43715949	43734164	527	F	AC175271.5	122552	140767	+
chrY	43734165	43850779	528	F	AC218129.3	1	116615	-
chrY	43850780	44045243	529	F	AC216984.3	18834	213297	+
chrY	44045244	44176315	530	F	AC217071.9	42856	173927	+
chrY	44176316	44193967	531	A	AC234947.4	5831	23482	-
chrY	44193968	44194167	532	N	200	clone	yes
chrY	44194168	44228429	533	A	AC234947.4	41059	75320	+
chrY	44228430	44228769	534	N	340	clone	yes
chrY	44228770	44230802	535	A	AC234947.4	91530	93562	-
chrY	44230803	44231305	536	N	503	clone	yes
chrY	44231306	44233508	537	A	AC234947.4	1	2203	-
chrY	44233509	44234320	538	N	812	clone	yes
chrY	44234321	44237160	539	A	AC234947.4	2376	5215	+
chrY	44237161	44239710	540	N	2550	clone	yes
chrY	44239711	44244676	541	A	AC234947.4	99312	104277	-
chrY	44244677	44245382	542	N	706	clone	yes
chrY	44245383	44248903	543	A	AC234947.4	87877	91397	+
chrY	44248904	44250738	544	N	1835	clone	yes
chrY	44250739	44257177	545	A	AC234947.4	104573	111011	+
chrY	44257178	44259190	546	N	2013	clone	yes
chrY	44259191	44264613	547	A	AC234947.4	93743	99165	-
chrY	44264614	44273280	548	A	AC239750.1	5501	14167	+
chrY	44273281	44273531	549	N	251	clone	yes
chrY	44273532	44277300	550	A	AC236837.1	108653	112421	+
chrY	44277301	44282792	551	A	AC236837.1	23904	29395	-
chrY	44282793	44284951	552	A	AC234947.4	38106	40264	-
chrY	44284952	44287477	553	A	AC234947.4	82035	84560	+
chrY	44287478	44295347	554	A	AC236837.1	35811	43680	-
chrY	44295348	44354641	555	A	AC236837.1	46405	105698	-
chrY	44354642	44356905	556	A	AC239750.1	24050	26313	-
