# Supplementary material for: Sequence analysis in Bos taurus reveals pervasiveness of X–Y arms races in mammalian lineages
Source: HighWire-hosted journal article supplement (doi:10.1101/gr.269902.120), 2020-11-18
Supplement: Supplemental_Table_S2.xlsx [file Supplemental_Table_S2.xlsx]

## Sheet: Sheet1
Supplemental Table S2: Radiation hybrid panel mapping results
STS name	STS length (bp)	Position in assembly	Location	LOD score*	Retention frequency	Left oligo	Right oligo
2040	177	147002	E0037H23	12.8498	0.05	GACAACCCTGCCATAGAGGA	CACATGCCCCACAACTAAGA
1141	193	556662	E0106B14	7.63522	0.05	CAATGCAACAAACCTAGCGA	GAAAAGCTGCATCGGTAAGC
2037	475	1148995	E0317I05	21.31	0.06	ATCACCACCAGCTCGAAGTT	TCGTGTGGTATTGGCAATGT
2049	704	1212000	E0468D16	21.3123	0.05	TCATCCATTCAACGCAATGT	TGCGTGGTCATACCATCATC
1157	616	1223540	E0468D16	14.3771	0.06	AGACATCTTGGCTGGCAGTT	GTCAGATGAGACCATGGCAA
289	475	1492371	E0223B23	16.9774	0.11	TTGAGAGCACGGAGGAACTT	AGAATCTGAGTCAGCCGGAA
1164	265	1980420	E0117D11		0.11	TGGGCATTTTCTTTCCTTTG	CTACAGGATGAGGTGAGGTATGC
1697	541	5626056	E0455C23	19.3892	0.11	AATCCCTGGGTGAATATCCC	GTGGCCAAAGTACTGGCATT
1236	433	5945359	E0055L18	22.0671	0.11	TGGACCAGAAACGGGATTTA	GGTCCAGTACAAATCAAATCAAGG
2047	593	5991055	A0099H05		0.09	GAAGTGGGATAACCTCCCAG	TGTTTTCTGGTCCCCTGAAG
2025	498	6747012	E0286P01		0.05	CACAGTCTCCAAGGGACAGG	ATTGCCAGGAGGGTCCTTTA
2021	448	6381861	TSPY2-PRAME2 array		0.07	AGAACATTTCACGCCAAAGC	CCCCTCTTCCTCTGATTGTG
2023	450	6728981	TSPY2-PRAME2 array	13.2587	0.18	ATGGAGGGTAAACAACATGC	GGAGGCACTGGTAATGGAAAC
1056	605	7367216	E0401M09		0.15	CAAATGTGATTTCCATCCCC	TTCGGACTTTGACAGAGGCT
877	241	7413237	E0344H23	15.1412	0.15	GATTCTGCTGTTTCTTTCATGG	GCATGCAAACAATTTTACAGGA
1140	163	7896804	E0417B02	6.47495	0.16	AGAGGGAAGGAGAGGGTGAG	AAATCCTTTGCATCTCGCAC
1416	266	8267191	E0295D07	21.1407	0.12	ATCCGCCTTTGACTGGTCT	GCAGCATAAGGACCTGCTTC
1412	658	9044235	E0466H07	6.49382	0.24	GGGCATGGCAACCATGTAT	GTGCTTGCTCCTTGGAAGTC
1206	319	9149138	E0280O10	43.6719	0.33	GCCATGGTCACAGGTCCTG	TCTCACACAGCCCTGATCTG
2100	616	9876548	E0233D24		0.24	GCAACAAAACCATGCAACAC	CAGTTCAACAAGCTGACGGA
2097	529	9877720	E0233D24	36.7883	0.28	TCTTCCTCCTTGACAATGGC	CAGCACCCTAGACTTCCCTG
1201	279	10063043	E0150O02	23.1009	0.49	GAAAACTTAAACTGCAAGGCAATAAT	TGTAGAGGTGGGGGTGTTGT
1192	642	14486341	E0427A03		0.16	CAGATGACATGATCCTCTAGATGA	AGCTGTCCATATGTGCATGG
1180	680	14879258	E0103H04		0.1	CCTCTAAAGGATTCCTGCCC	GACCTTGGACATGGGGTCT
1154	102	43447986	E0023I23	20.6087	0.09	GAACTCCGGGAGTTGGTTG	TGCGTTCAGTTCAATTCAAGC
923	502	43550784	E0092K13	5.42982	0.09	ATTGTTGTATGCCATCACCG	GGAGCCCATGCTCTGAAAC
853	164	44239545	E0020G15		0.05	CCTGGTTTTTCTCCACCTCC	CCATTGCCTTCAGCATTTGT
2052	372	44356905	near telomere	14.318	0.05	CAGAAATTTGCCTTGCTTCA	TTACCCCTTGACCCTAACCC
*LOD score refers to linkage between given marker and marker below
