# Supplementary material for: Sequence analysis in Bos taurus reveals pervasiveness of X–Y arms races in mammalian lineages
Source: HighWire-hosted journal article supplement (doi:10.1101/gr.269902.120), 2020-11-18
Supplement: Supplemental_Table_S3.xlsx [file Supplemental_Table_S3.xlsx]

## Sheet: Sheet1
Supplemental Table S3: GenBank accession numbers and references for bull MSY genes
Gene name	Accession number	Reference
AMELY	NM_174240.2	Gibson C., et al. Biochemistry 30:1075 (1991).
DDX3Y	FJ659845.1	Gotherstrom A., et al. Proc Royal Society B 272:2345 (2005)
EIF1AY	NM_001145757.1	Van Laere ,A.S., et al. Genome Res 18:1884 (2008)
EIF2S3Y	FJ627276.1	This study
HSFY	NM_001077006.1	Moore et al., Direct GenBank submission: BC103406 (2007)
OFD1Y	JN193532.1	Van Laere, A.S., et al. Genome Res 18:1884 (2008)
PRAMEY1	NM_001245953.1	Chang, T.C., et al. PLoS ONE 6:E16867 (2011)
PRAMEY2	GU144302.1	Chang, T.C., et al. PLoS ONE 6:E16867 (2011)
PRAMEY3	XM_003587135.2	This study
RBMY	GU304599.2	Bellott, D.W., et al. Nature 508:494 (2014)
SRY	NM_001014385.1	Payen, E.J. and Cotinot, C.Y. Nucleic Acids Res 21:2772 (1993)
PRSSLY	KC120771.1	This study
TSPY1	JN585955.1	Jakubiczka, S., et al. Genomics 3:732 (1993)
TSPY2	JN585956.1	This study
USP9Y	FJ627275.1	Van Laere ,A.S., et al. Genome Res 18:1884 (2008)
UTY	FJ627278.1	This study
ZFY	NM_177491.1	Aasen, E. and Medrano, J.F. Biotechnology 8:1279 (1990)
ZNF280BY	NM_001078120.1	Yang, Y., et al. BMC Genomics 12:13 (2011)
ZRSR2Y	GAPO01000004.1	Hamilton, C.K., et al. Theriogenology 77:1587 (2012)
