# Supplementary material for: Sequence analysis in Bos taurus reveals pervasiveness of X–Y arms races in mammalian lineages
Source: HighWire-hosted journal article supplement (doi:10.1101/gr.269902.120), 2020-11-18
Supplement: Supplemental_Table_S4.xlsx [file Supplemental_Table_S4.xlsx]

## Sheet: Sheet1
Supplemental Table S4: GenBank Accession Numbers for Bull HSFX-containing BACs
BAC Name	Accession Number
CH240-54K01	AC270084.1
CH240-104L19	AC270078.1
CH240-119C21	AC270083.1
CH240-176L20	AC270081.1
CH240-320F16	AC270080.1
CH240-352E13	AC270079.1
CH240-397I19	AC270077.1
CH240-437O20	AC270082.1
